# Supplementary material for: Nonsense-mediated mRNA decay efficiency varies in choroideremia providing a target to boost small molecule therapeutics
Source: PubMed Central journal article supplement (PMC6522067; doi:10.1093/hmg/ddz028), 2019-01-23
Supplement: supplemental_data_hmg_ddz028_supp.pdf [file supplemental_data_hmg_ddz028_supp.pdf]

## Supplemental Data

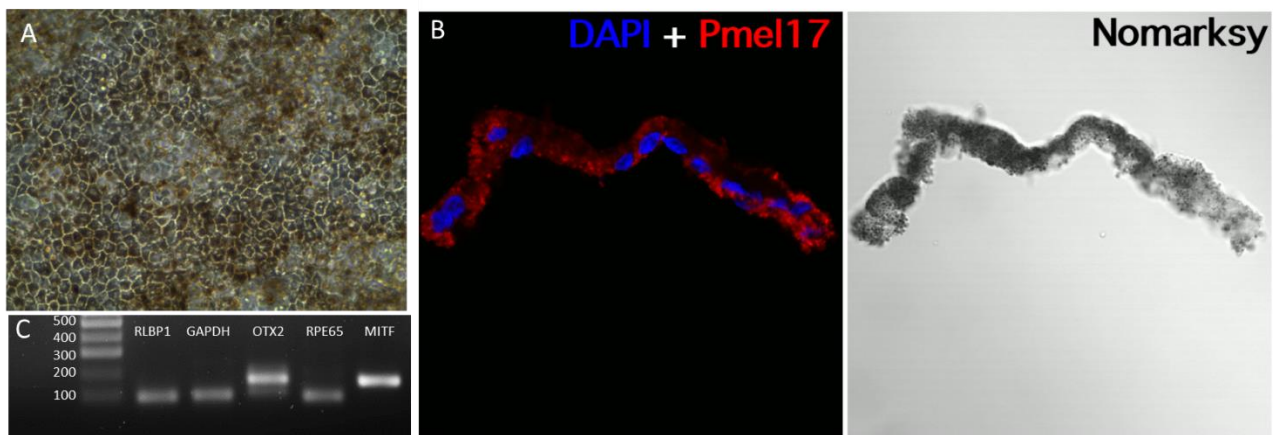

**Figure S1:** Characterisation of *CHM*<sup>Y42X</sup> patient derived iPSC-RPE. **(A)** Differentiated iPSC-RPE, displaying characteristic cobblestone morphology. **(B)** Immunostaining of iPSC-RPE sections stained for Pmel17 (red) and counterstained for DAPI (blue). **(C)** RT-PCR gel electrophoresis of RPE cell markers.
